# Supplementary material for: Accuracy of direct genomic breeding values for nationally evaluated traits in US Limousin and Simmental beef cattle
Source: PubMed Central journal article supplement (PMC3536607; doi:10.1186/1297-9686-44-38), 2012-12-07

# Birth weight

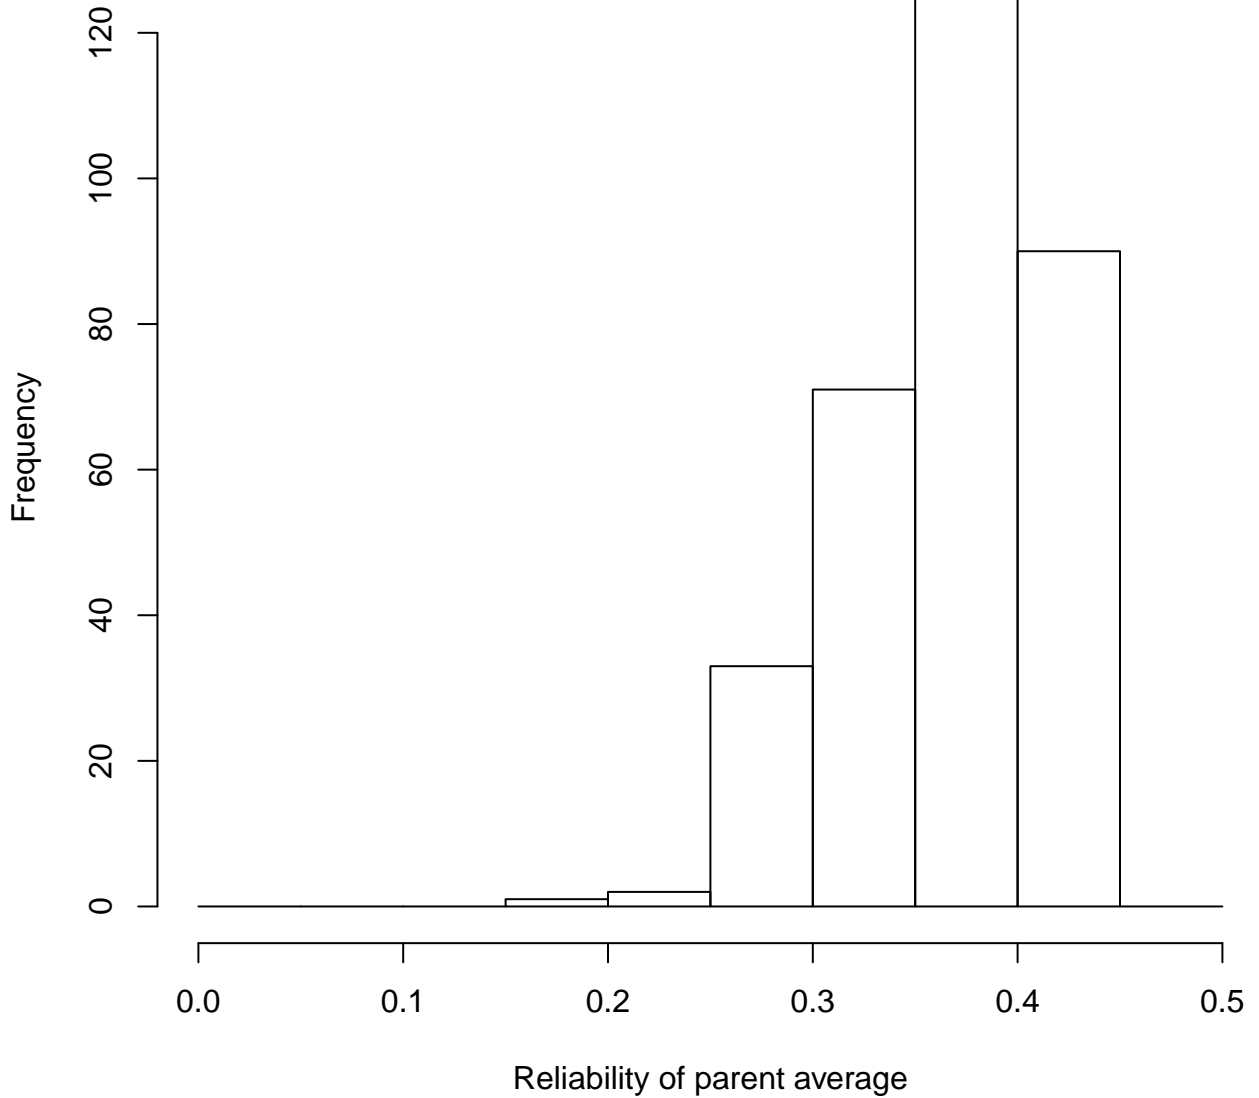

# Calving ease direct

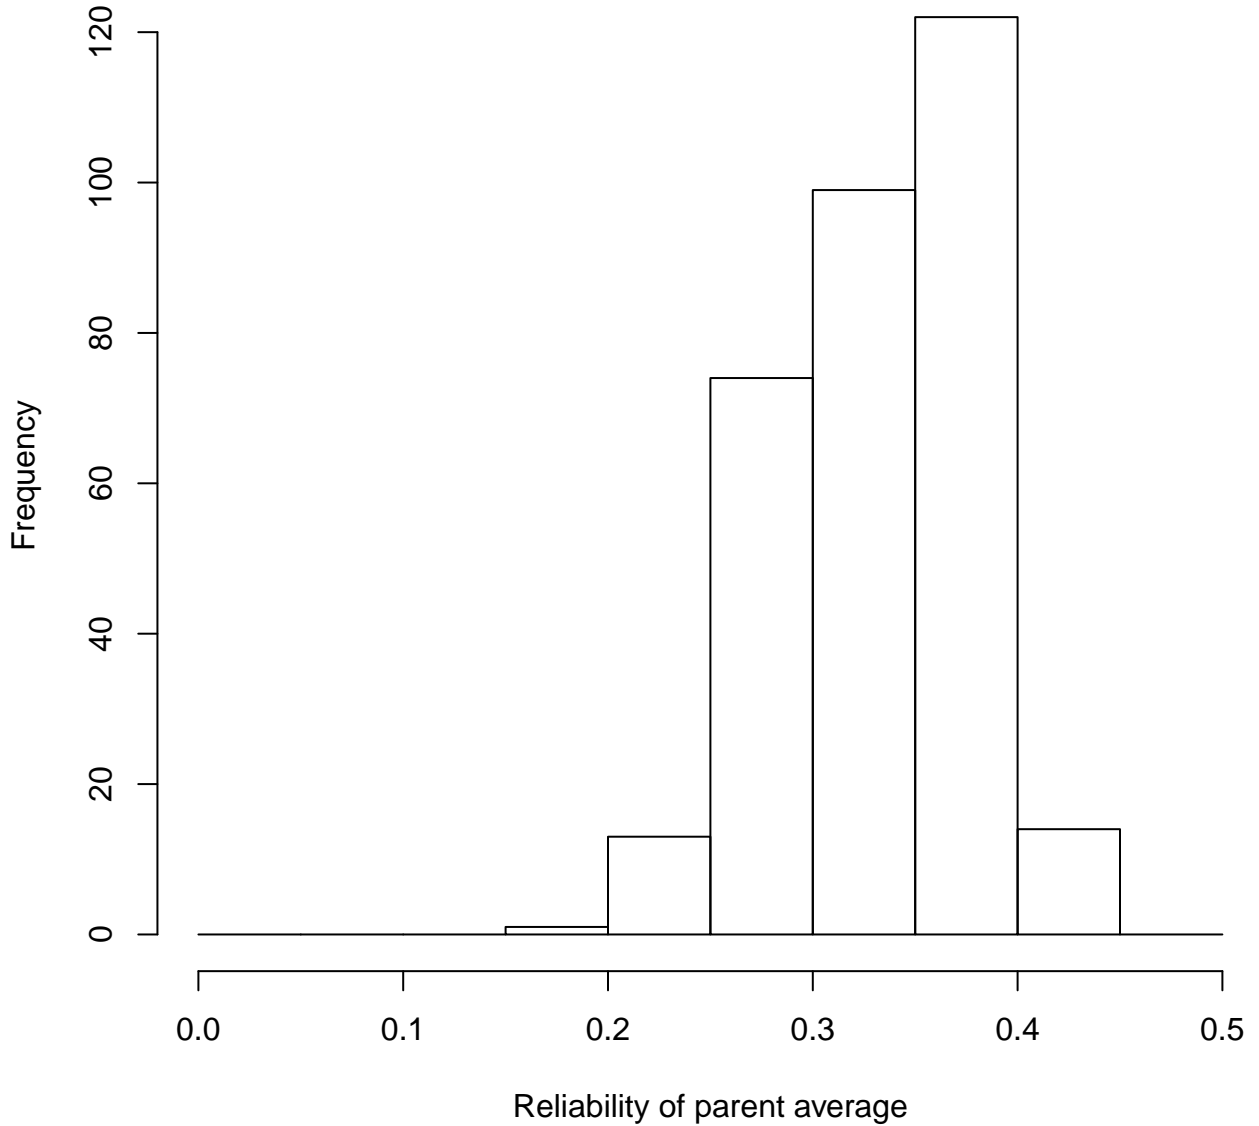

# Calving ease maternal

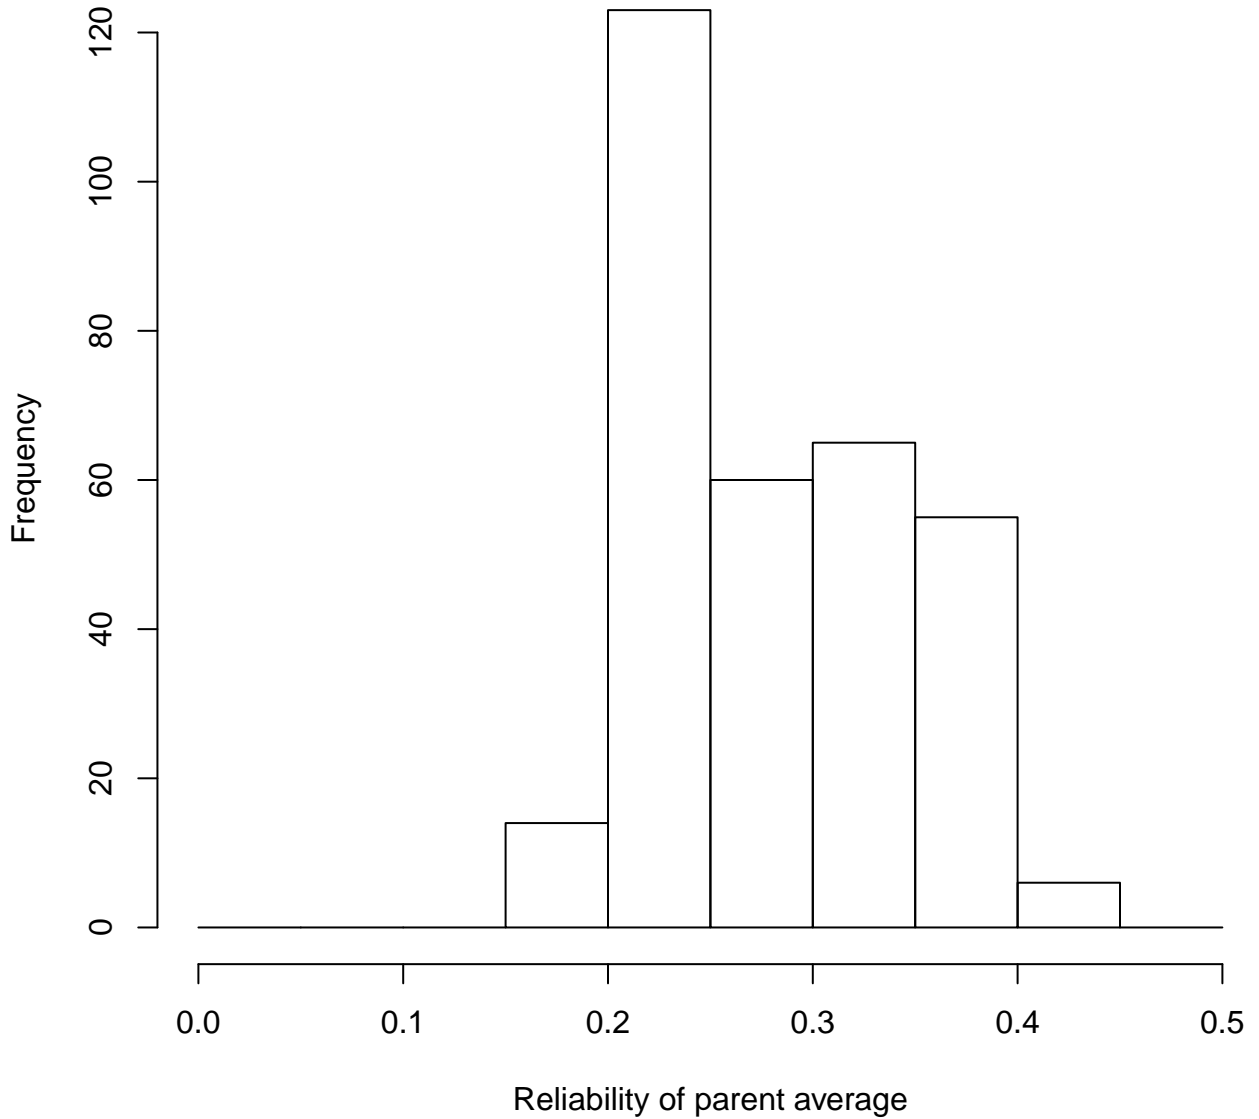

# Carcass weight

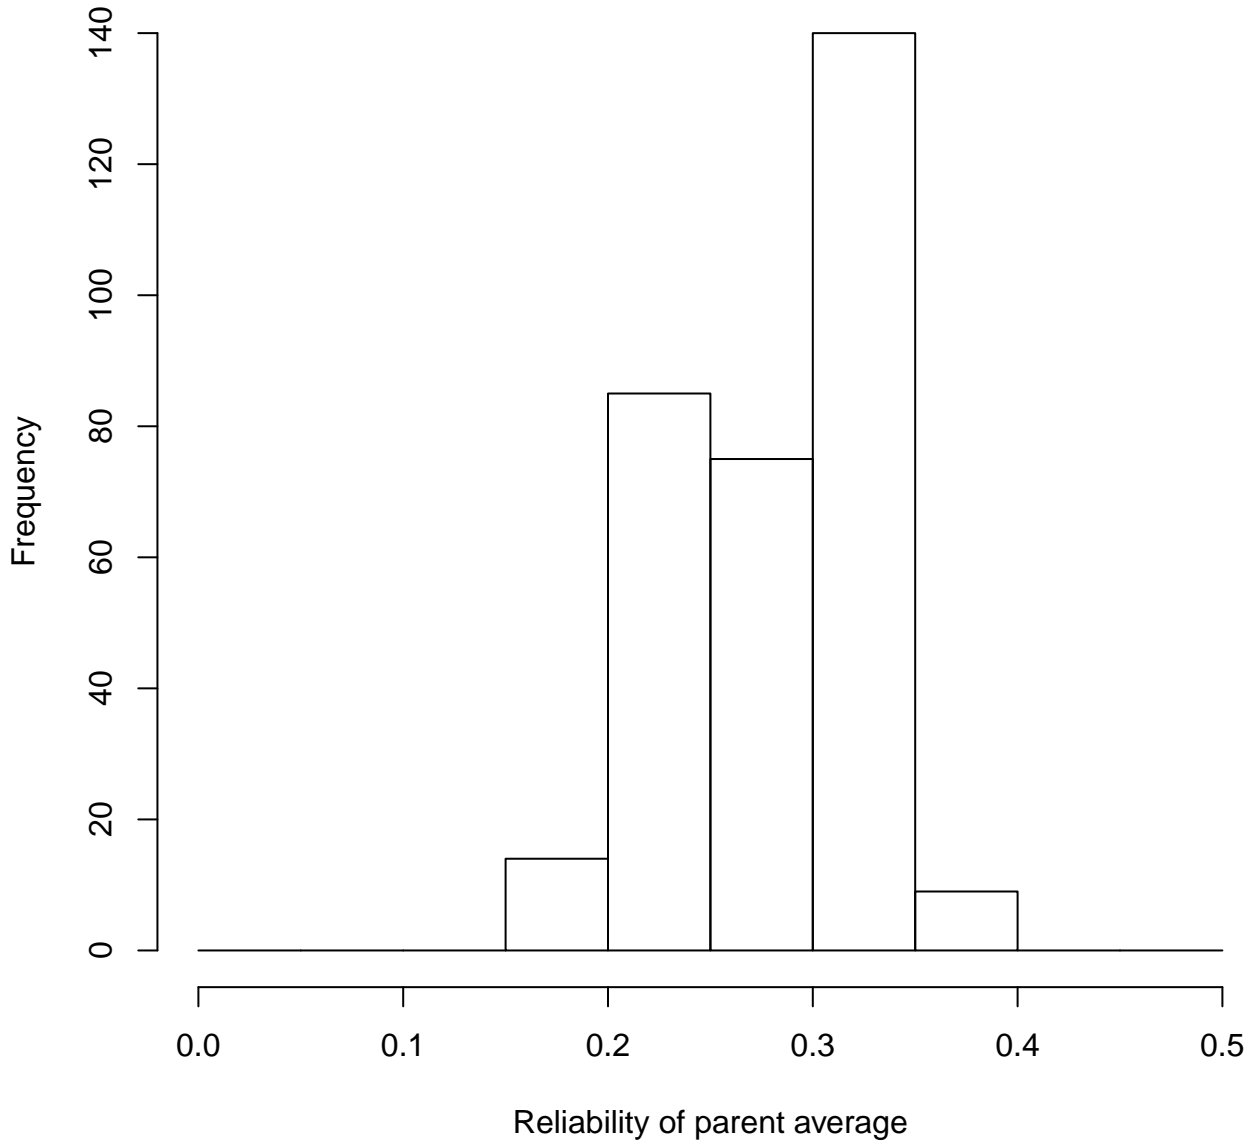

# Fat thickness

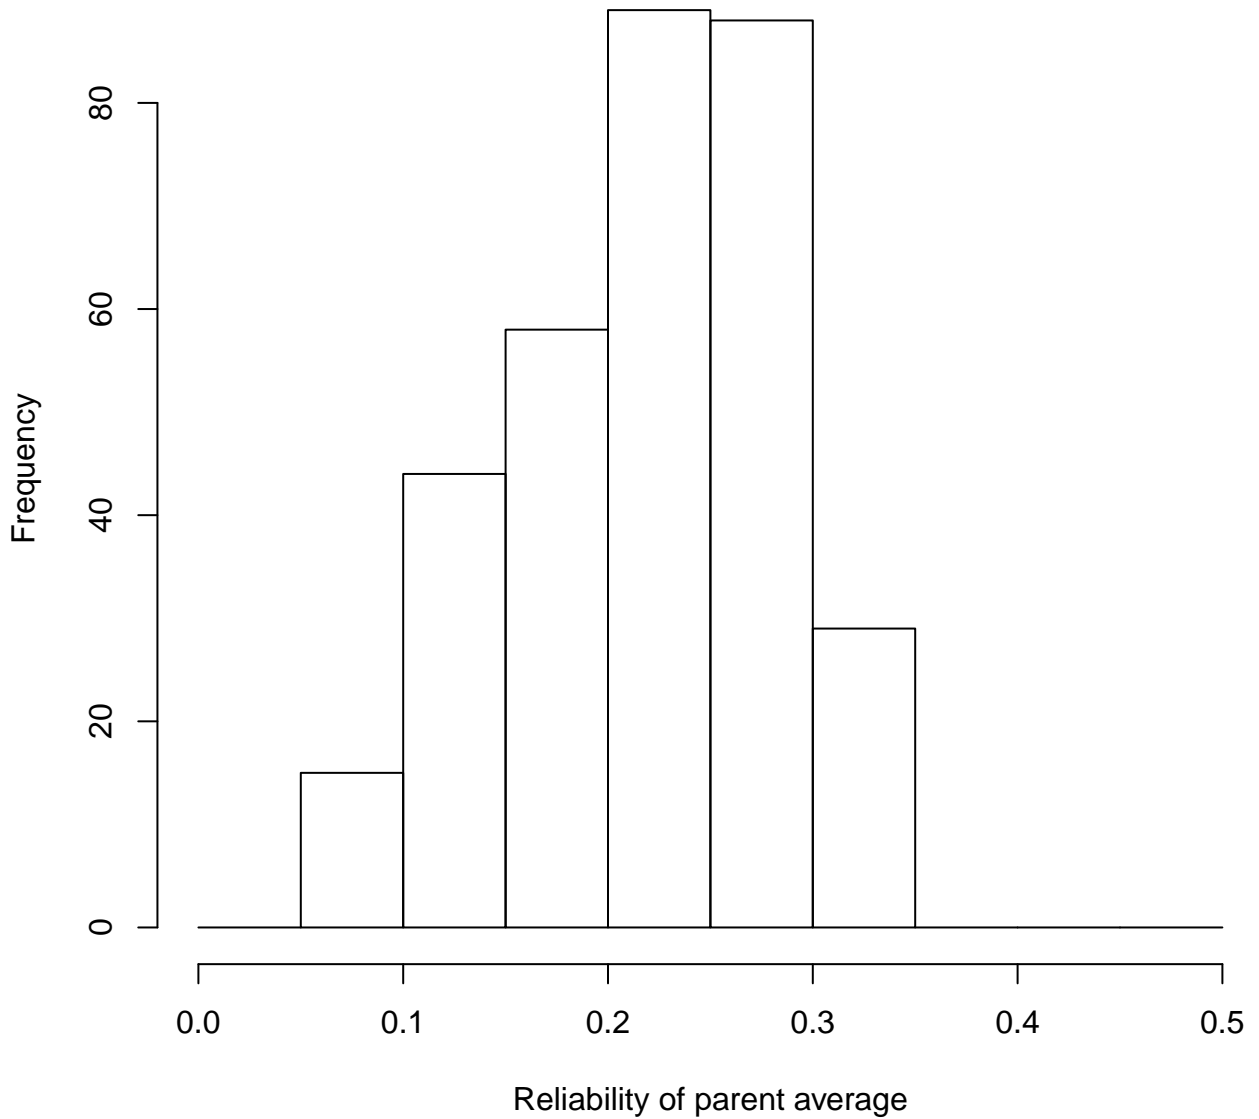

# Marbling

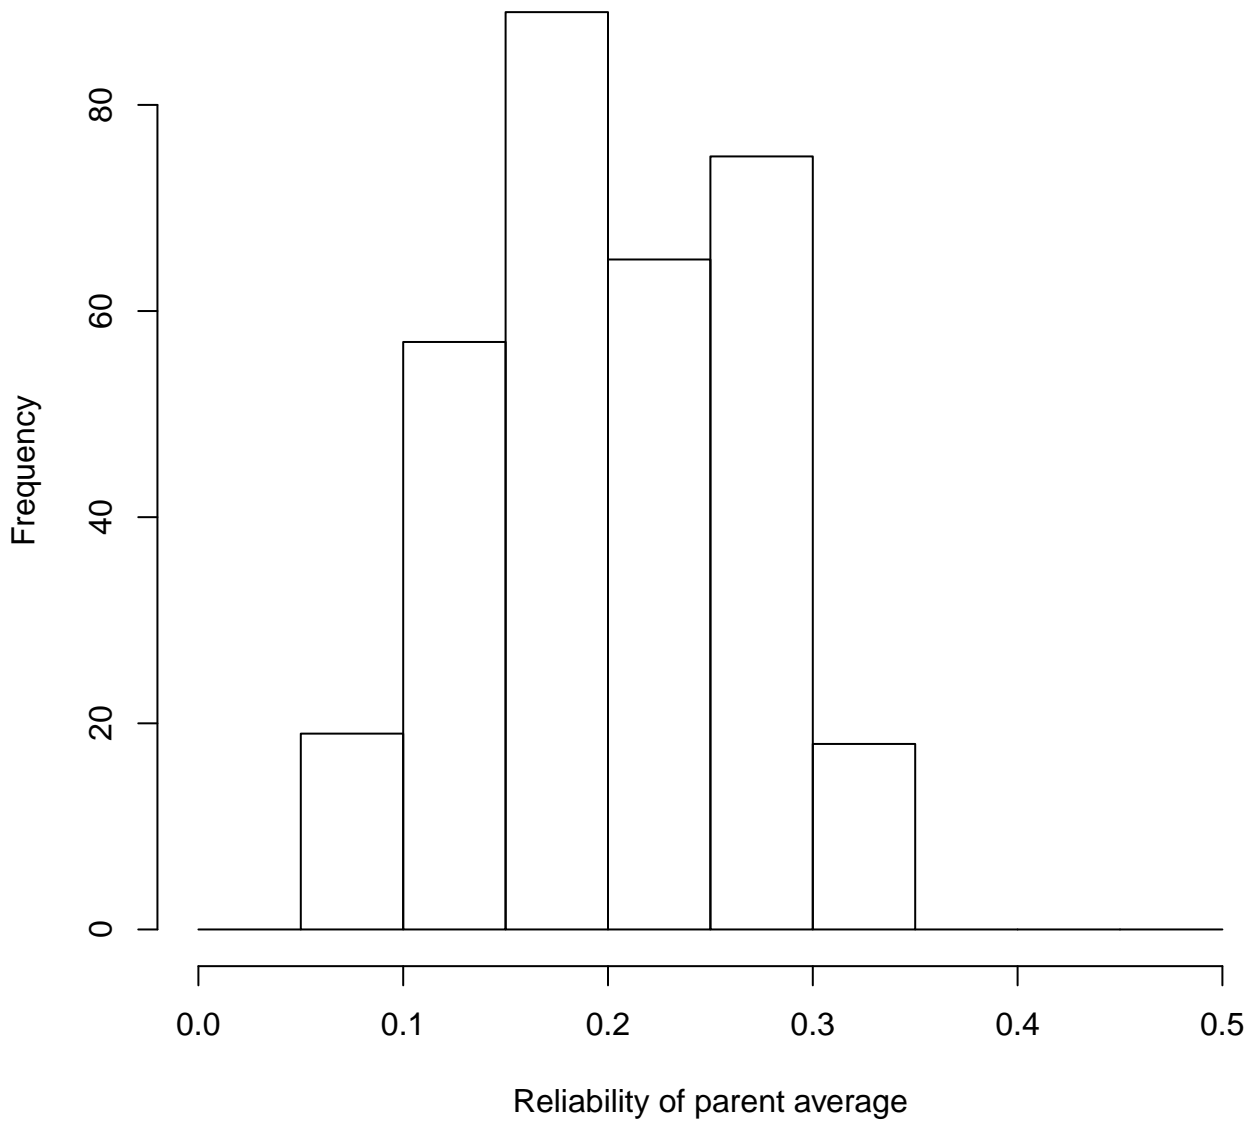

# Rib eye muscle area

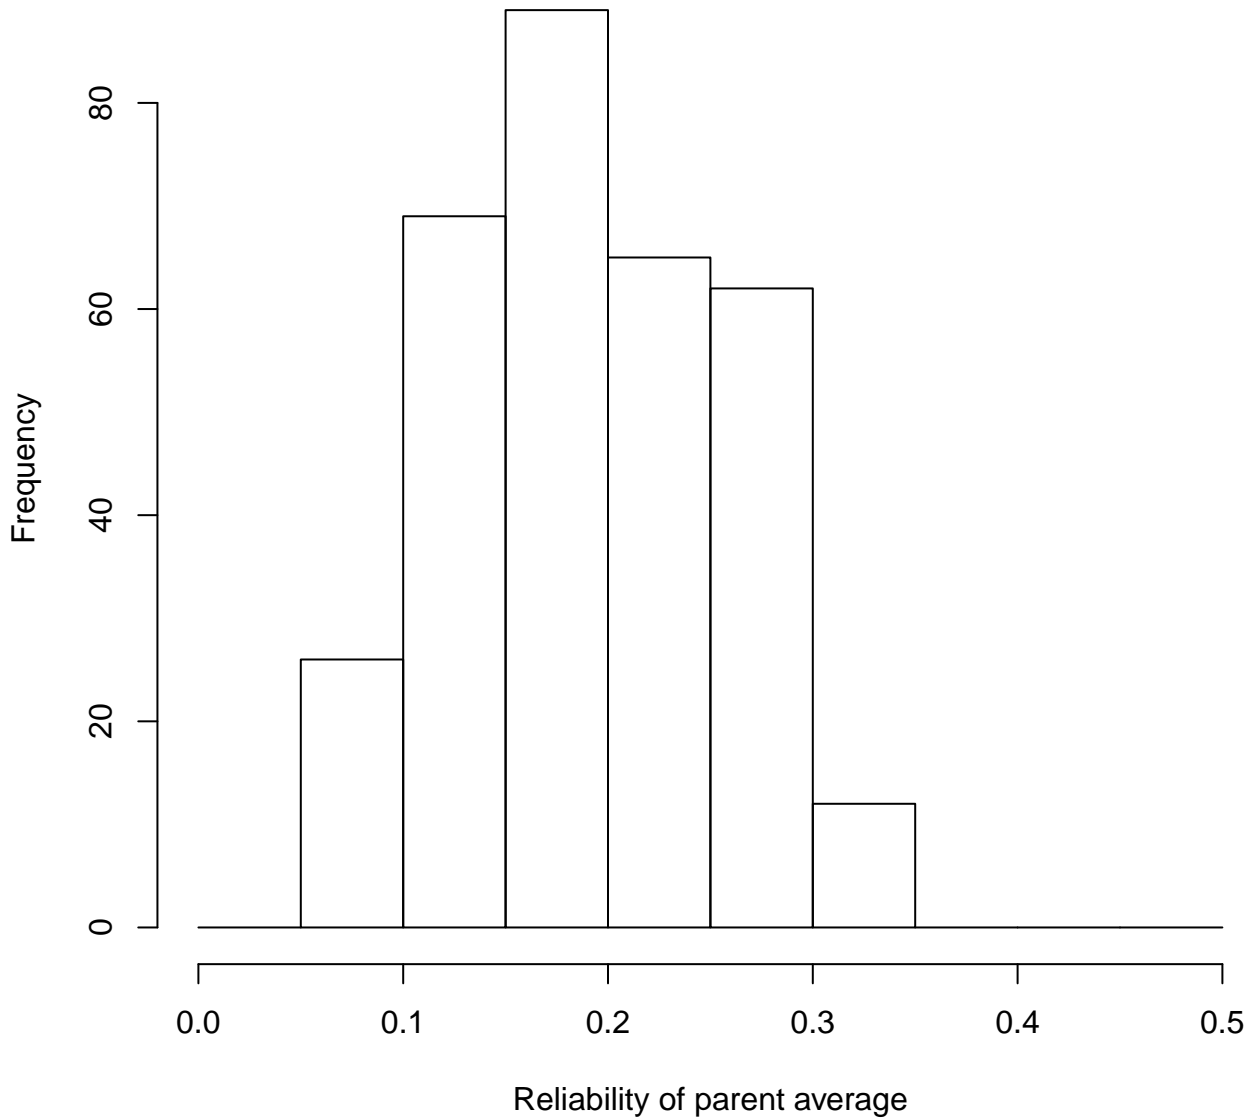

# Shear force

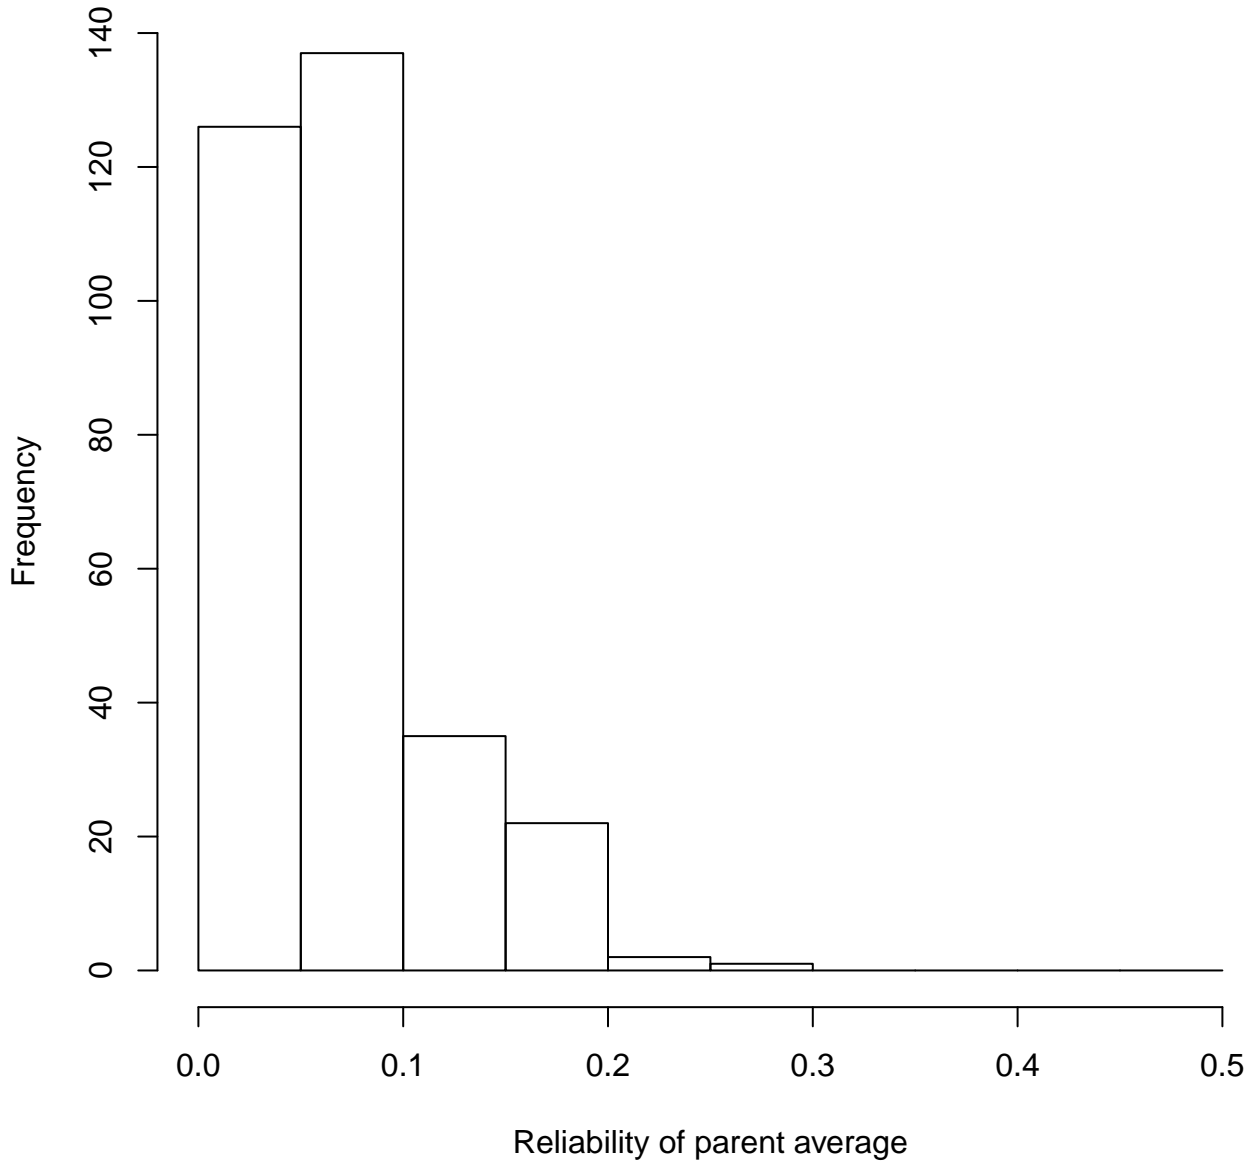



# Stayability

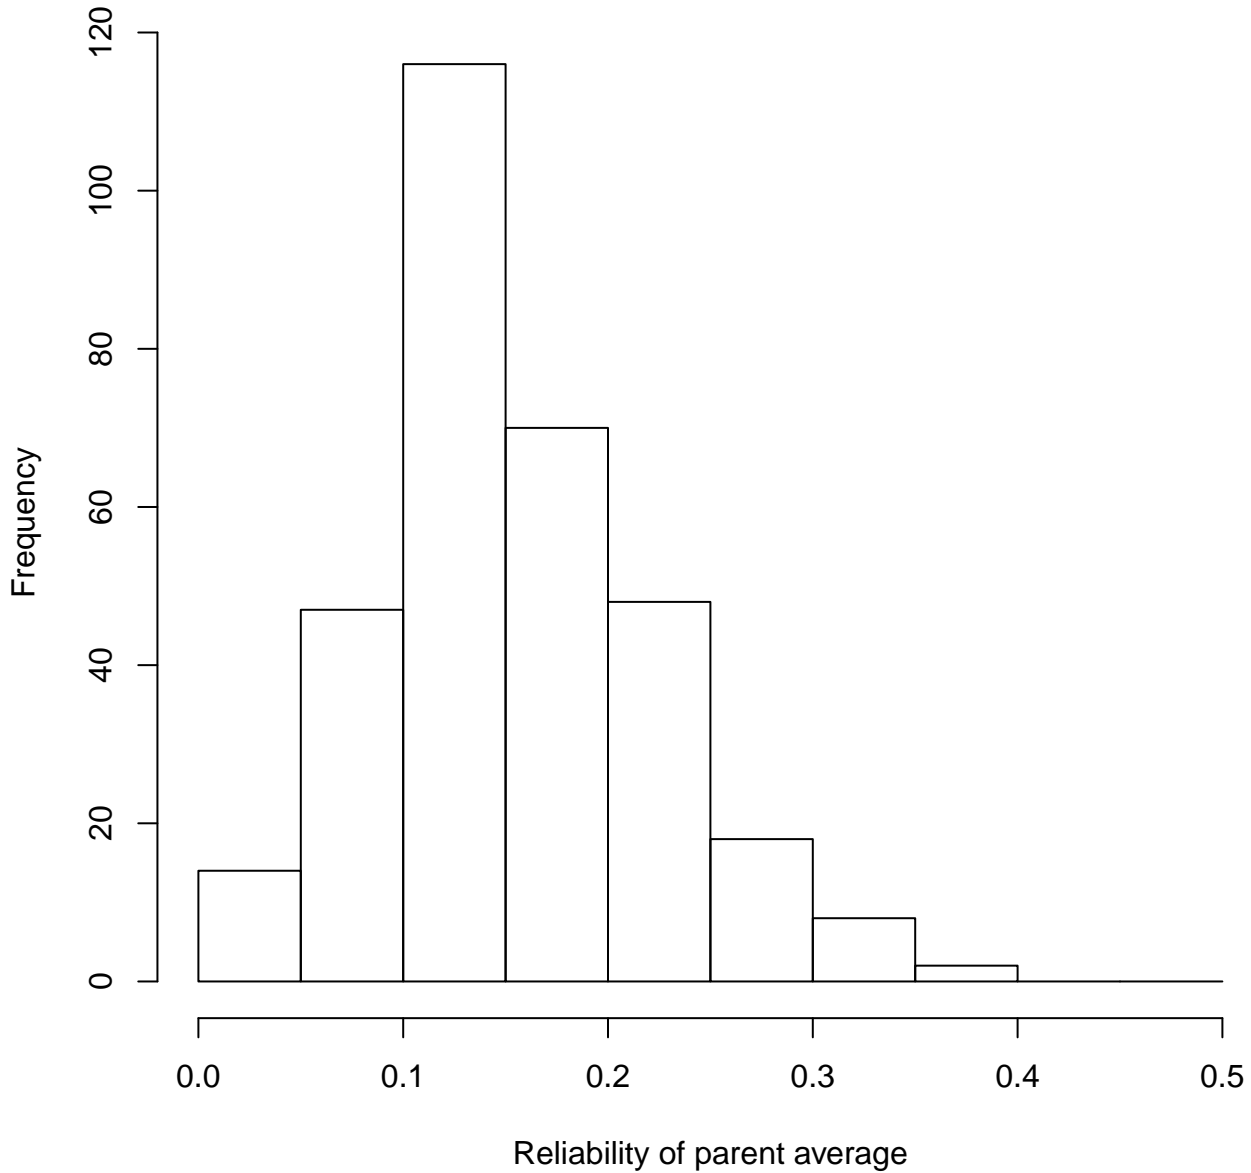

# Weaning weight direct

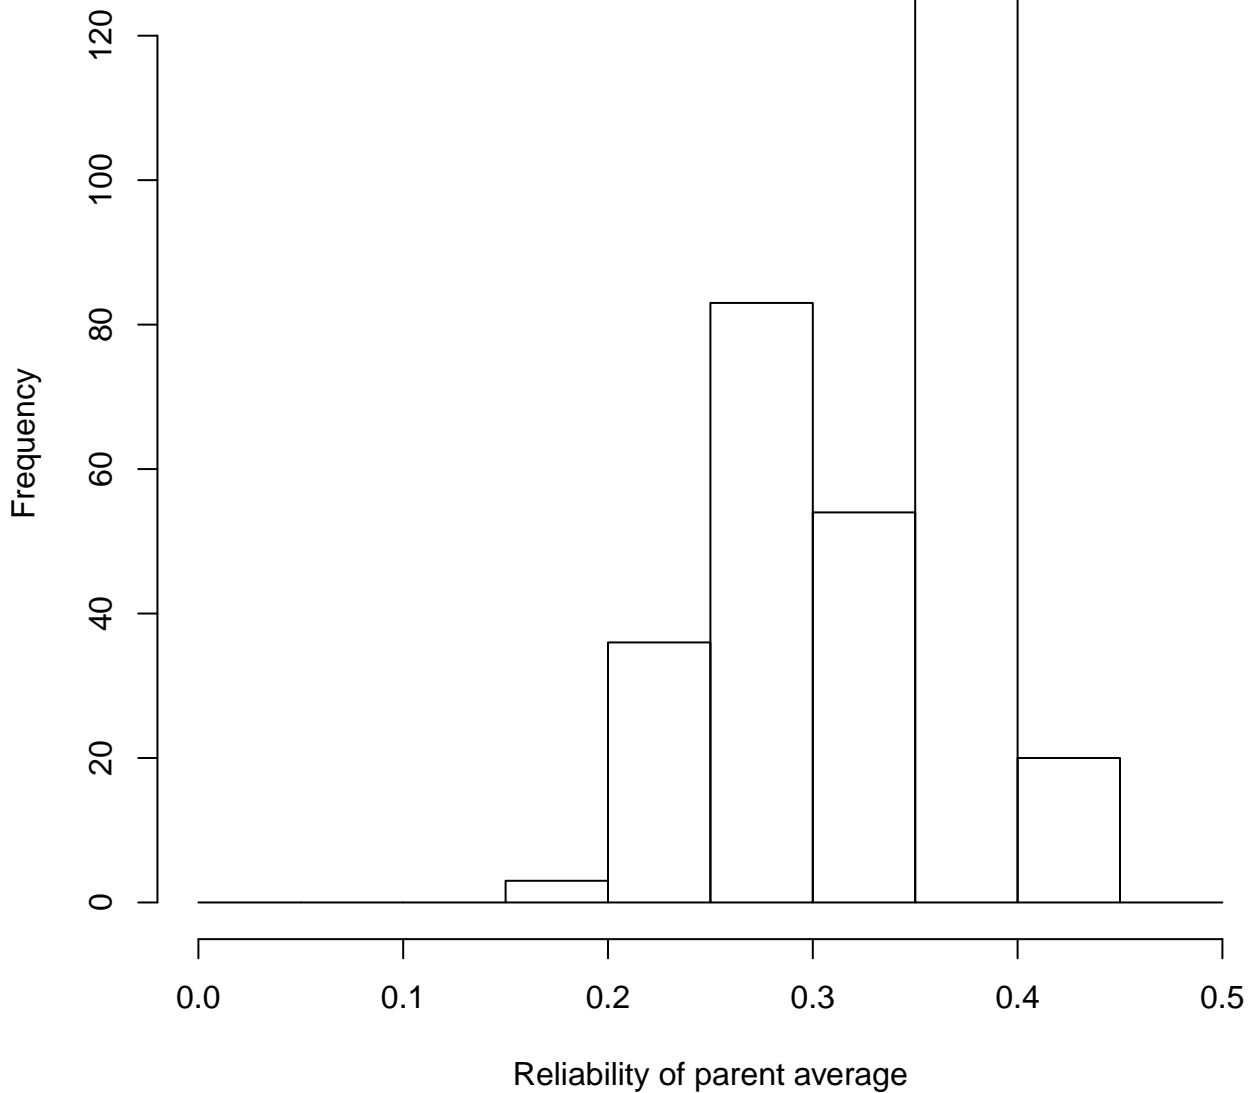

# Weaning weight maternal

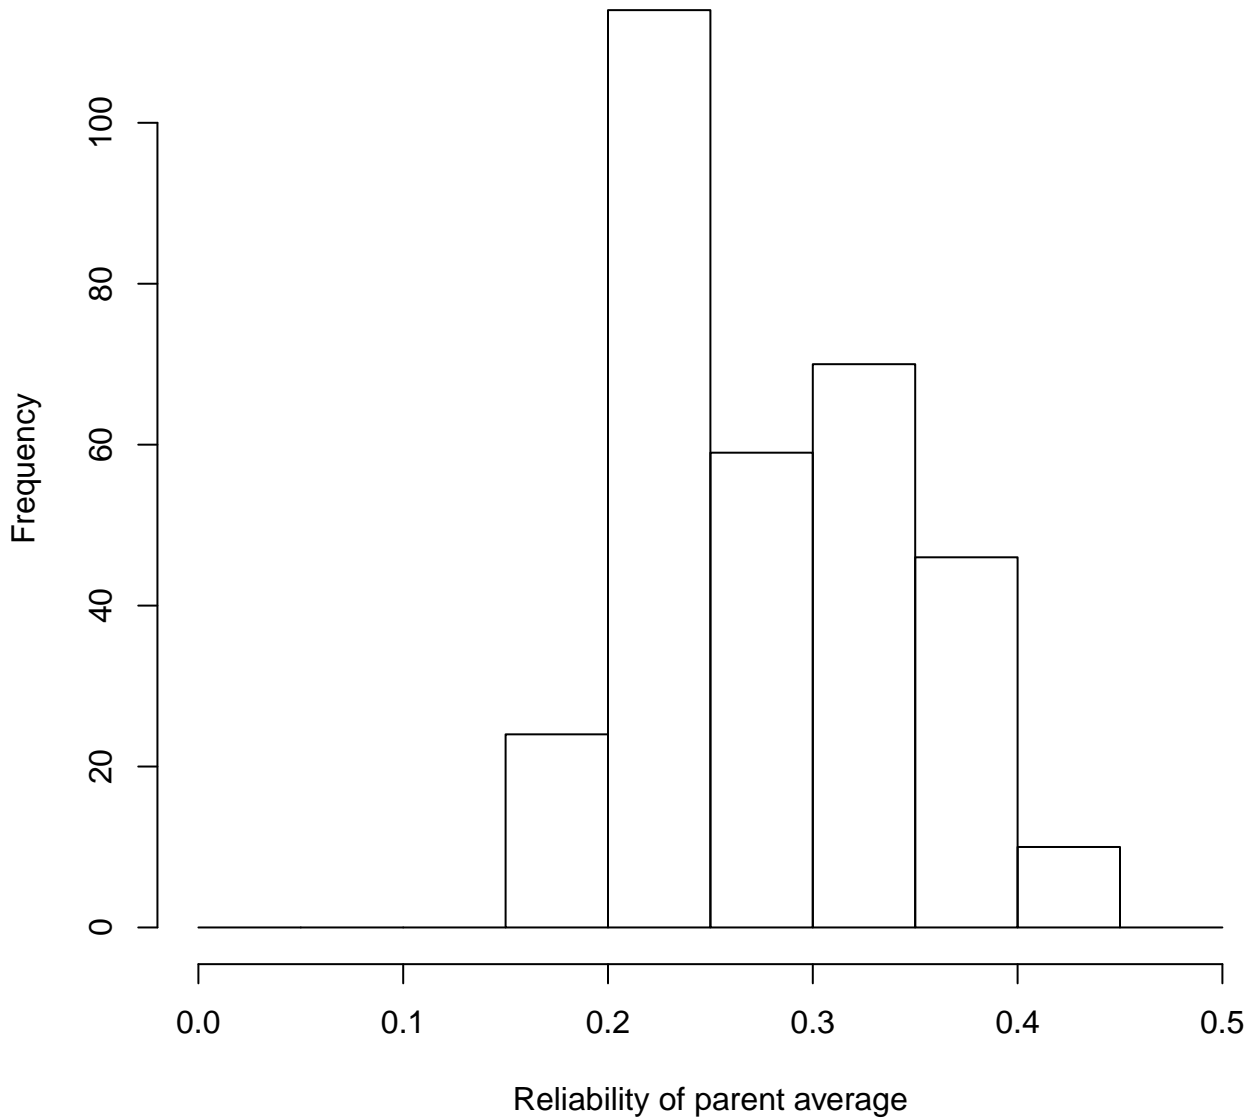

# Yield grade

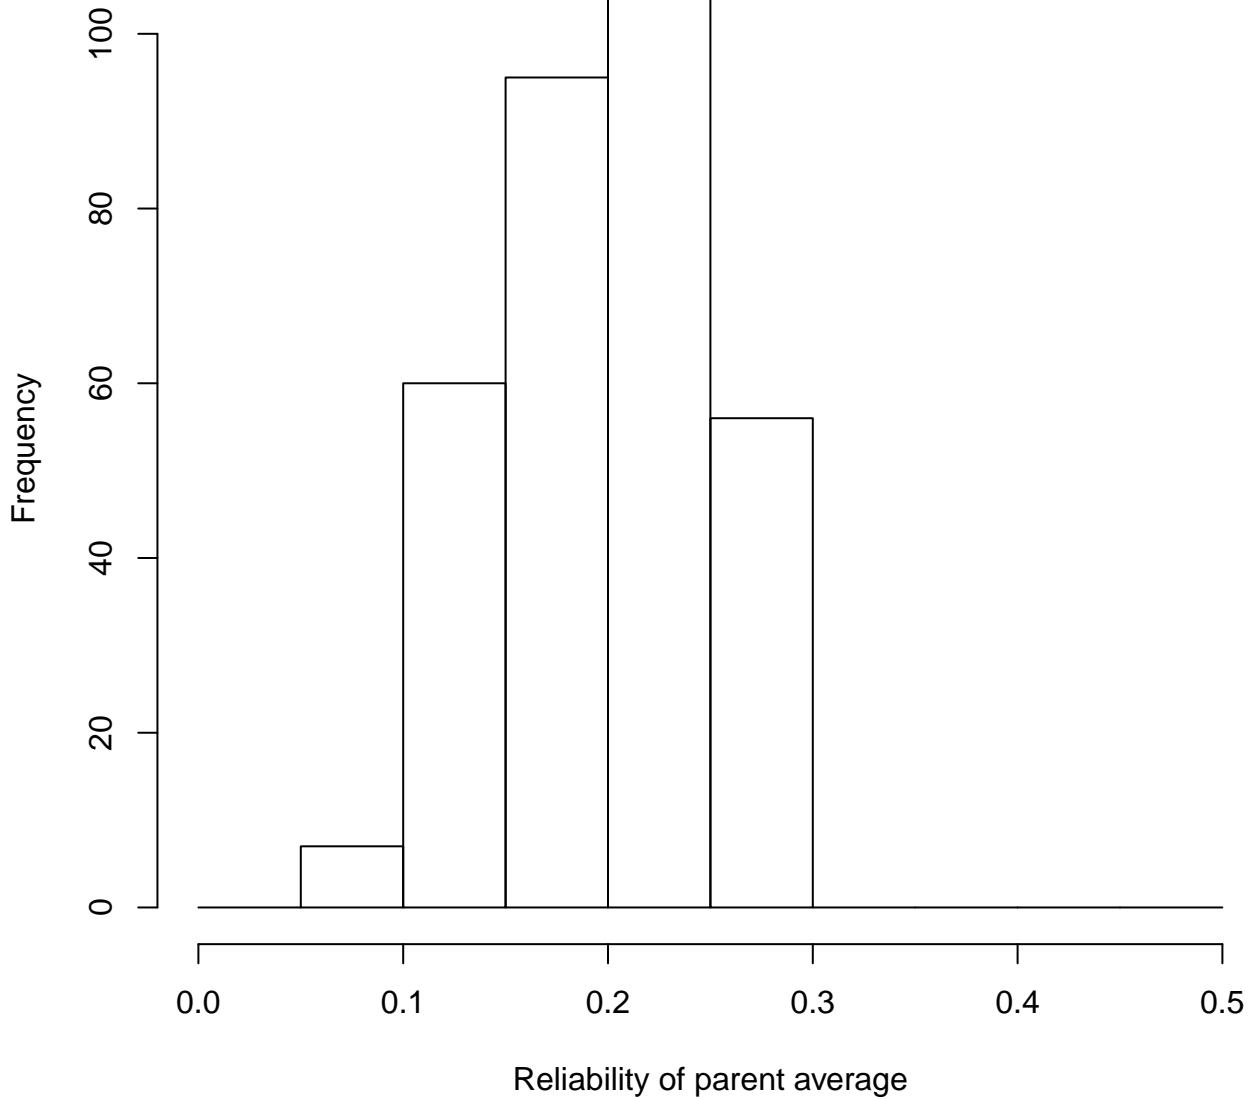

# Yearling weight

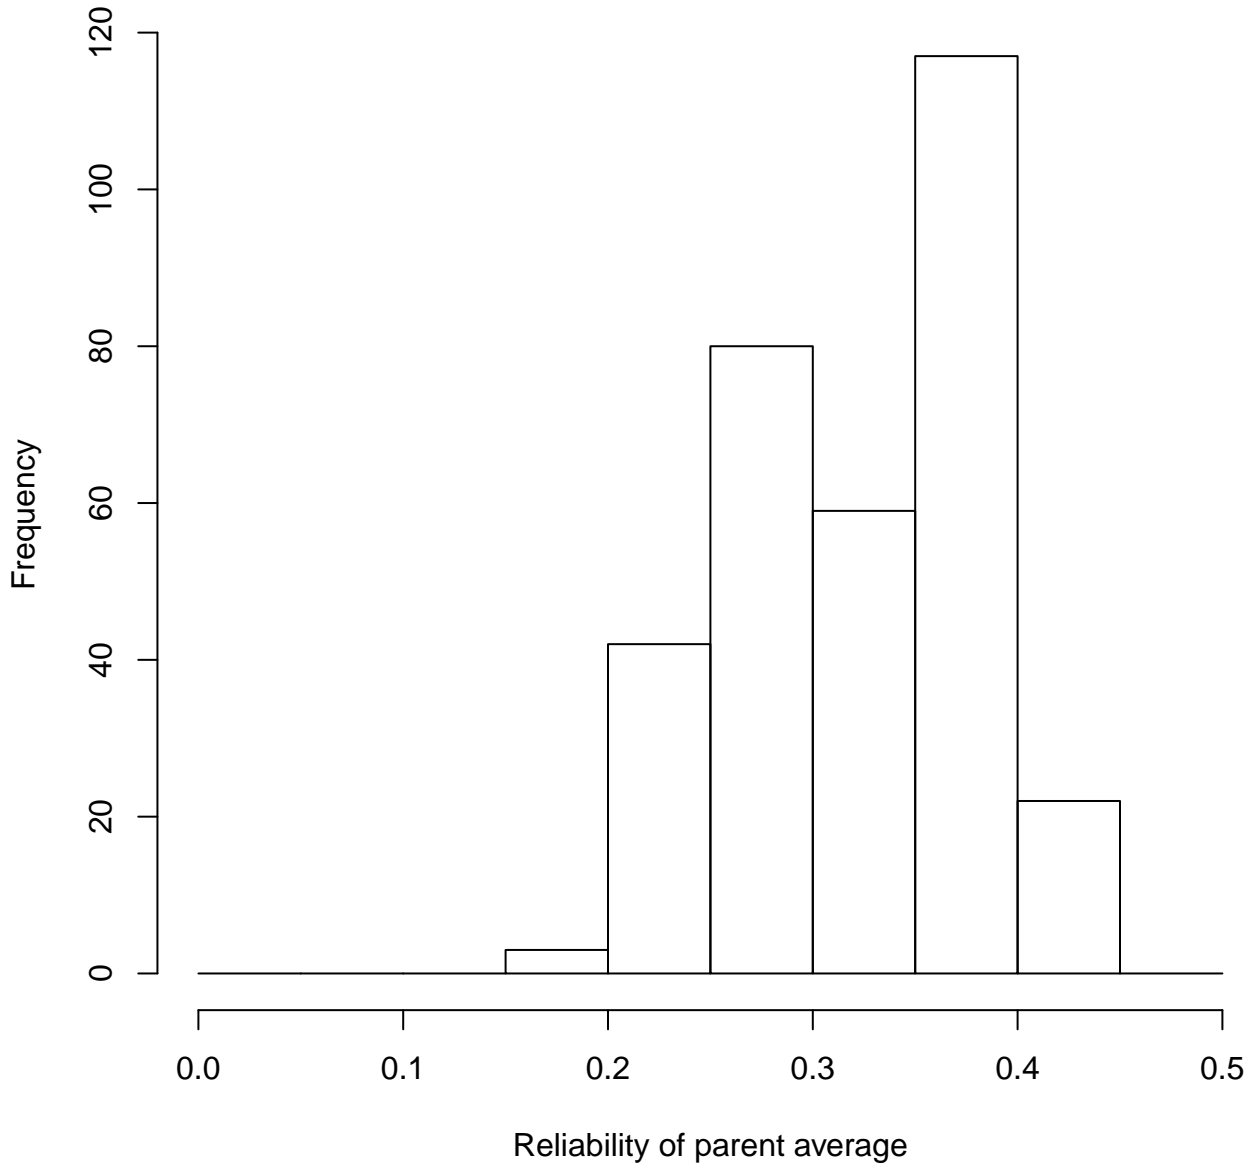

Supplement: 1297-9686-44-38-S1.pdf [file 1297-9686-44-38-S1.pdf]
